# Supplementary material
Source: Springer Nature journal article supplement (https://www.springermedizin.de/resource/supplementary/12958_2010_867_MOESM10_ESM.pdf/9569054)

3

pl

10

kDa

75-

50-

Z2

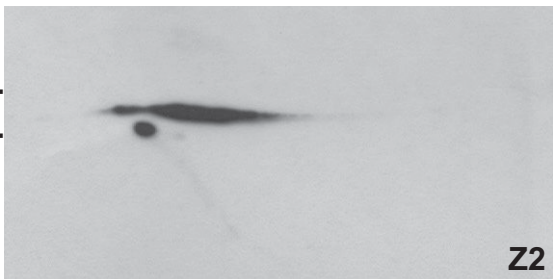

75-

50-

Z4

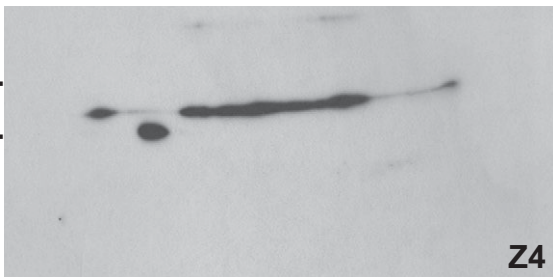

75-

50-

Z6

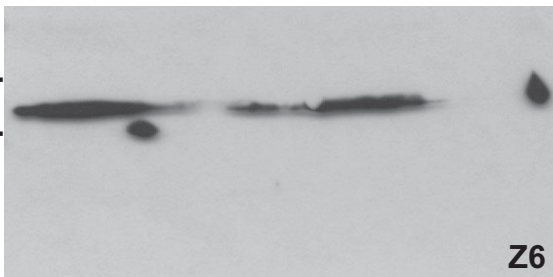

75-

50-

Z9

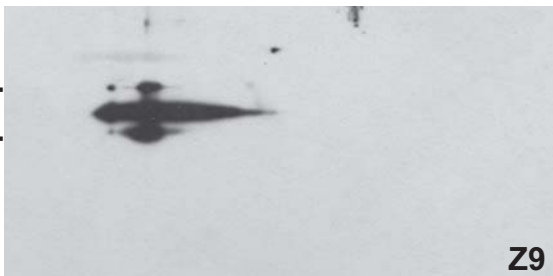

3

pl

10

Supplement: MOESM10 [file 9569054]
